# Supplementary material for: Hydrophobically Modified let-7b miRNA Enhances Biodistribution to NSCLC and Downregulates HMGA2 In Vivo
Source: PubMed Central journal article supplement — Mol Ther Nucleic Acids. 2019 Nov 18;19:267–77. doi: 10.1016/j.omtn.2019.11.008 (PMC6926262; doi:10.1016/j.omtn.2019.11.008), 2019-11-18
Supplement: mmc1.pdf [file mmc1.pdf]

OMTN, Volume 19

## Supplemental Information

**Hydrophobically Modified *let-7b* miRNA**

**Enhances Biodistribution to NSCLC**

**and Downregulates HMGA2 *In Vivo***

**Meirav Segal, Annabelle Biscans, Maud-Emmanuelle Gilles, Eleni Anastasiadou, Roberto De Luca, Jihoon Lim, Anastasia Khvorova, and Frank J. Slack**

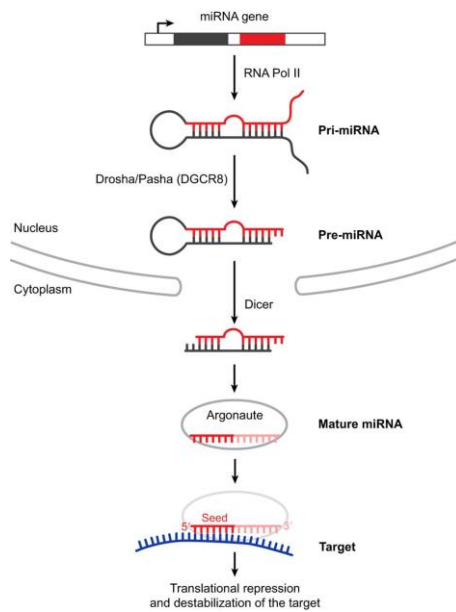

Suppl. Fig 1. MicroRNA biogenesis and mechanism of action. Canonical miRNA biogenesis begins with the generation of the pri-miRNA transcript. The complexes, Drosha and DiGeorge Syndrome Critical Region 8 (DGCR8), cleaves the pri-miRNA to produce the precursor-miRNA (pre-miRNA). The pre-miRNA is exported to the cytoplasm and processed to produce the mature miRNA duplex. Finally, either the 5p or 3p strands of the mature miRNA duplex is loaded into the Argonaute (AGO) proteins to induced gene silencing.

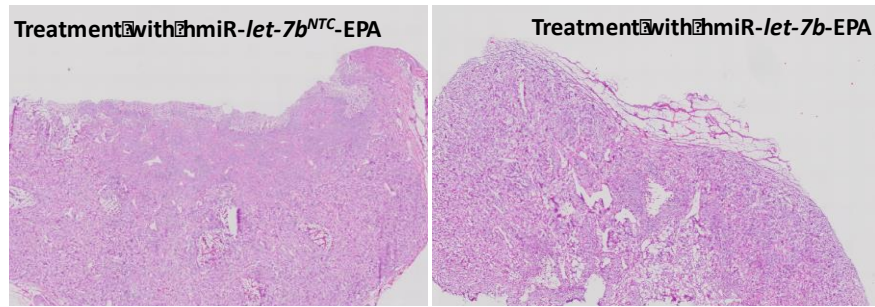

Suppl. Fig 2. A representative image of H&E staining from sections of the treated tumors with EPA-hmiR-*let-7b* and NTC
