# Supplementary material for: Hydrophobically Modified let-7b miRNA Enhances Biodistribution to NSCLC and Downregulates HMGA2 In Vivo
Source: PubMed Central journal article supplement — Mol Ther Nucleic Acids. 2019 Nov 18;19:267–77. doi: 10.1016/j.omtn.2019.11.008 (PMC6926262; doi:10.1016/j.omtn.2019.11.008), 2019-11-18
Supplement: mmc2.pdf [file mmc2.pdf]

# Hydrophobically Modified *let-7b* miRNA Enhances Biodistribution to NSCLC and Downregulates *HMGA2* *In Vivo*

Meirav Segal,<sup>1</sup> Annabelle Biscans,<sup>3</sup> Maud-Emmanuelle Gilles,<sup>1</sup> Eleni Anastasiadou,<sup>1</sup> Roberto De Luca,<sup>2</sup> Jihoon Lim,<sup>1</sup> Anastasia Khvorova,<sup>3</sup> and Frank J. Slack<sup>1</sup>

<sup>1</sup>HMS Initiative for RNA Medicine, Department of Pathology, Beth Israel Deaconess Medical Center/Harvard Medical School, Boston, MA, USA; <sup>2</sup>HMS Initiative for RNA Medicine, Department of Neurology, Beth Israel Deaconess Medical Center/Harvard Medical School, Boston, MA, USA; <sup>3</sup>RNA Therapeutics Institute, University of Massachusetts Medical School, Worcester, MA, USA

**MicroRNAs (miRNAs) have increasingly been shown to be involved in human cancer, and interest has grown about the potential use of miRNAs for cancer therapy. miRNA levels are known to be altered in cancer cells, including in non-small cell lung cancer (NSCLC), a subtype of lung cancer that is the most prevalent form of cancer worldwide and that lacks effective therapies. The *let-7* miRNA is involved in the regulation of oncogene expression in cells and directly represses cancer growth in the lung. *let-7* is therefore a potential molecular target for tumor therapy. However, applications of RNA interference for cancer research have been limited by a lack of simple and efficient methods to deliver oligonucleotides (ONs) to cancer cells. In this study, we have used *in vitro* and *in vivo* approaches to show that HCC827 cells internalize hydrophobically modified *let-7b* miRNAs (hmiRNAs) added directly to the culture medium without the need for lipid formulation. We identified functional *let-7b* hmiRNAs targeting the *HMGA2* mRNA, one of the *let-7* target genes upregulated in NSCLC, and show that direct uptake in HCC827 cells induced potent and specific gene silencing *in vitro* and *in vivo*. Thus, hmiRNAs constitute a novel class of ONs that enable functional studies of genes involved in cancer biology and are potentially therapeutic molecules.**

## INTRODUCTION

*let-7* encodes a microRNA (miRNA) that targets *HMGA2* in lung cancer.<sup>1–6</sup> Lung cancer is responsible for the most cancer-related deaths for both men and women in the US with an estimated 224,390 new cases and 158,080 deaths from the disease in 2016.<sup>7</sup> Regardless of improving survival rates in the last decades, only about 18% of patients are alive 5 years after diagnosis, emphasizing the urgent need for better therapies.

MiRNAs are small non-coding RNAs that control gene expression at a post-transcriptional step and have important functions in tumorigenesis<sup>1,8,9</sup> (Figure S1). miRNAs are known to be dysregulated in many types of cancer, and specific miRNA expression patterns characterize normal versus tumor tissue or differentiated versus poorly differentiated tumors.<sup>8,10–12</sup> Upregulated miRNAs in cancer cells

promote carcinogenesis by attenuating tumor suppressor genes and are known as oncomiRs (oncogenic miRNAs).<sup>13</sup> Alternatively, miRNAs with low expression levels in cancer cells that typically halt cancer progression by suppression of the expression of oncogenes are called tumor suppressor miRNAs.<sup>14</sup> Silencing highly expressed miRNA with anti-miRNA (antimiRs or antagomirs) or substituting tumor suppressor miRNAs with miRNA mimetics has been demonstrated as a valuable experimental strategy for the treatment of cancer. In particular, we have shown the *let-7* has promise as a tumor suppressor in pre-clinical mouse models of lung cancer.<sup>15–17</sup>

Therapeutic oligonucleotides (ONs) are an emerging therapeutic alternative to treat diseases with known genetic origin—i.e., antisense ONs, small interfering RNA (siRNA),<sup>18</sup> miRNAs,<sup>11</sup> and aptamers<sup>19</sup>—and are revealing themselves as a new class of drugs. Their advantages over conventional drugs include: simple construction, logically achieved based on sequence data and straightforward screening, short time frame, leading to drug candidates, and good potency and duration of effect.<sup>11</sup> Nonetheless, as this emerging field has developed in the last two decades it has become obvious that there are several limitations to overcome before such RNAi-based drug candidates become a reality.

Problems such as delivery-associated toxicity, poor transfection efficiency, systemic clearance, nonspecific biodistribution, and degradation in circulation have delayed the therapeutic potential of miRNAs.<sup>20,21</sup> Perhaps the most challenging concern that is now dealt with by many academic laboratories and biotech companies is oligonucleotide drug delivery to extrahepatic tissues in the body.<sup>22,23</sup> This major limitation is partly due to the membrane impermeability of oligonucleotide therapeutics, since there is no passive diffusion of the ON to most cells and therefore the ON is delivered at a high

Received 30 July 2019; accepted 7 November 2019;  
<https://doi.org/10.1016/j.omtn.2019.11.008>.

**Correspondence:** Frank J. Slack, HMS Initiative for RNA Medicine, Department of Pathology, Beth Israel Deaconess Medical Center/Harvard Medical School, Boston, MA, USA.

**E-mail:** [fslack@bidmc.harvard.edu](mailto:fslack@bidmc.harvard.edu)

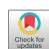

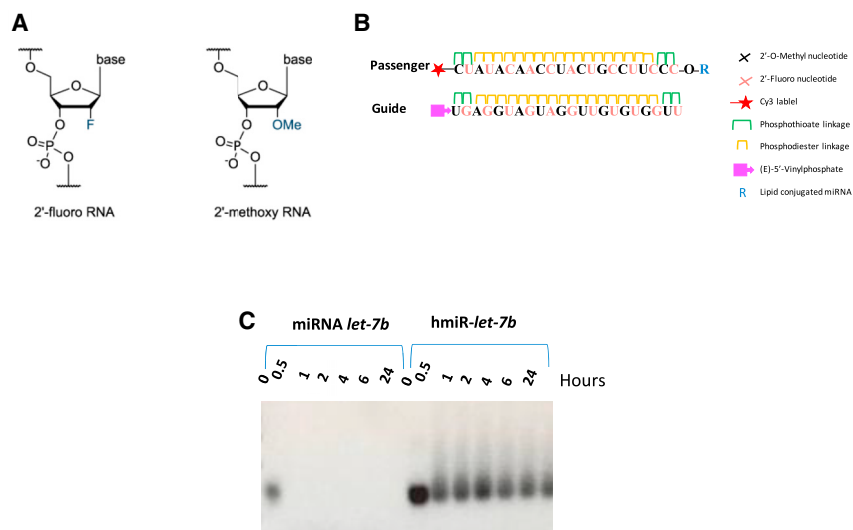

**Figure 1. Chemical modifications stabilize *let-7b***

(A) Modifications of ribose at the 2' position. (B) General scheme of lipid-conjugated hmiRNAs. Top is the passenger strand shown 5' to 3'. Bottom is the guide strand shown 5' to 3'. (C) Stability of 5  $\mu$ M hmiR-*let-7b* versus miRNA *let-7b* in 50% serum.

(potentially toxic) dose or needs some directed mechanism by which it reaches its specific target. The absence of powerful delivery vehicles to target tissues outside the liver is now a primary bottleneck in miRNA-based therapeutics.

Lipid nanoparticles (LNPs) are attractive carriers for the delivery of nucleic acids due to their protection from nucleases,<sup>24,25</sup> and they have been used for miRNA delivery *in vivo*.<sup>26,27</sup> Most LNP fabrication favors delivery of miRNAs to liver, but engineering the lipid design of LNPs has been shown to alter their distribution, granting potent delivery to other organs.<sup>28,29</sup> Thus, different lipid elements might be used to enhance miRNA distribution. Indeed, lipid conjugates have been studied to increase miRNA bioavailability. Attachment of the first-tested lipophilic group, cholesterol (Chol), which interacts with serum components such as albumen and lipoproteins, increased circulation times and passive accumulation in the liver,<sup>30,31</sup> but it allowed distribution to other tissues too, including muscle and placenta, where they produced RNA silencing. Other lipid-conjugated miRNAs have been explored, including fatty acids and vitamin-conjugated miRNA, but delivery and potency were only evaluated in liver.<sup>32–34</sup>

Moreover, there are potential unwanted effects that are the result of the RNA duplex itself. These include (1) the activation of the immune response; (2) the incorporation of the passenger strand (sense) into RISC (RNA-induced silencing complex); (3) the miRNA potentially silencing genes other than the intended target gene; and (4) circulating time in the tissues. Several chemical modifications such as 2'-fluoro (2'-F)<sup>35</sup> and 2'-O-methyl (2'-OMe)<sup>1</sup> (Figure 1A) have been shown to lower such activities, pointing to the beneficial results of using synthetic RNA molecules to not only improve biostability but also to reduce toxicity.

Reducing the loading of the passenger strand to RISC has also been achieved by a variety of chemical modifications, some by specific

miRNA design<sup>36</sup> and others by replacing natural bases with synthetic ones. There are a variety of nucleotide mimics where the ribose is modified to increase affinity for the target and/or increase nuclease resistance (e.g., locked nucleic acid [LNA]<sup>37</sup>) or by 5'-capping.<sup>38,39</sup> The 2'-OMe modification has been shown to improve stability, reduce the immune response, and improve passenger strand RISC incorporation.<sup>40</sup> Moreover, the substitution of only one non-bridging oxygen of a phosphodiester with a sulfur atom creates the phosphorothioate linkage. Not only does the PS linkage protect oligonucleotides from nucleases, but PS oligonucleotides associate with plasma proteins, resulting in longer circulation times.<sup>41</sup> Recently, fully hydrophobically modified siRNA (hsiRNAs) were shown to improve functionality, while lipid-conjugated hsiRNAs were delivered to a variety of extrahepatic tissues.<sup>42–45</sup>

Here, we examined a novel oligonucleotide design to mimic *let-7b* and avoid some of the barriers of miRNA delivery mentioned above. We show fast internalization of hydrophobically modified *let-7b* miRNAs (hmiRNAs) in the non-small cell lung cancer (NSCLC) cell line HCC827 when added directly to the culture medium without lipid formulation. We analyzed functional *let-7b* hmiRNAs targeting of the mRNA of *HMG2*,<sup>16,46,47</sup> which is one of the genes upregulating during NSCLC, and show that direct uptake in HCC827 cells leads to potent and specific silencing *in vitro*. In addition, we systematically evaluated how lipid conjugates affect hmiRNA distribution *in vivo*. We synthesized hmiRNAs conjugated to three lipophilic moieties. We show that lipid conjugates enable miRNA accumulation and productive silencing in tumors after subcutaneous injection. Although most of the injected miRNA accumulates in clearance organs, we identified conjugates that enable functional miRNA delivery to lung tumor cells. The tissue concentrations of miRNA necessary for effective silencing varied depending on the tissue and lipid construct. Our findings provide proof of principle for the development of lipid-conjugated hmiRNA oligonucleotides as possible therapeutics for NSCLC.

## RESULTS

### Synthesis of DCA, EPA, and Cholesterol-hmiR-*let-7b* Conjugates

hmiRNA is a symmetric compound composed of a 21-nt modified RNA duplex. Nucleotides in the hmiRNA are modified with 2'-OMe or 2'-F (Figure 1A, passenger and guide strands) to promote

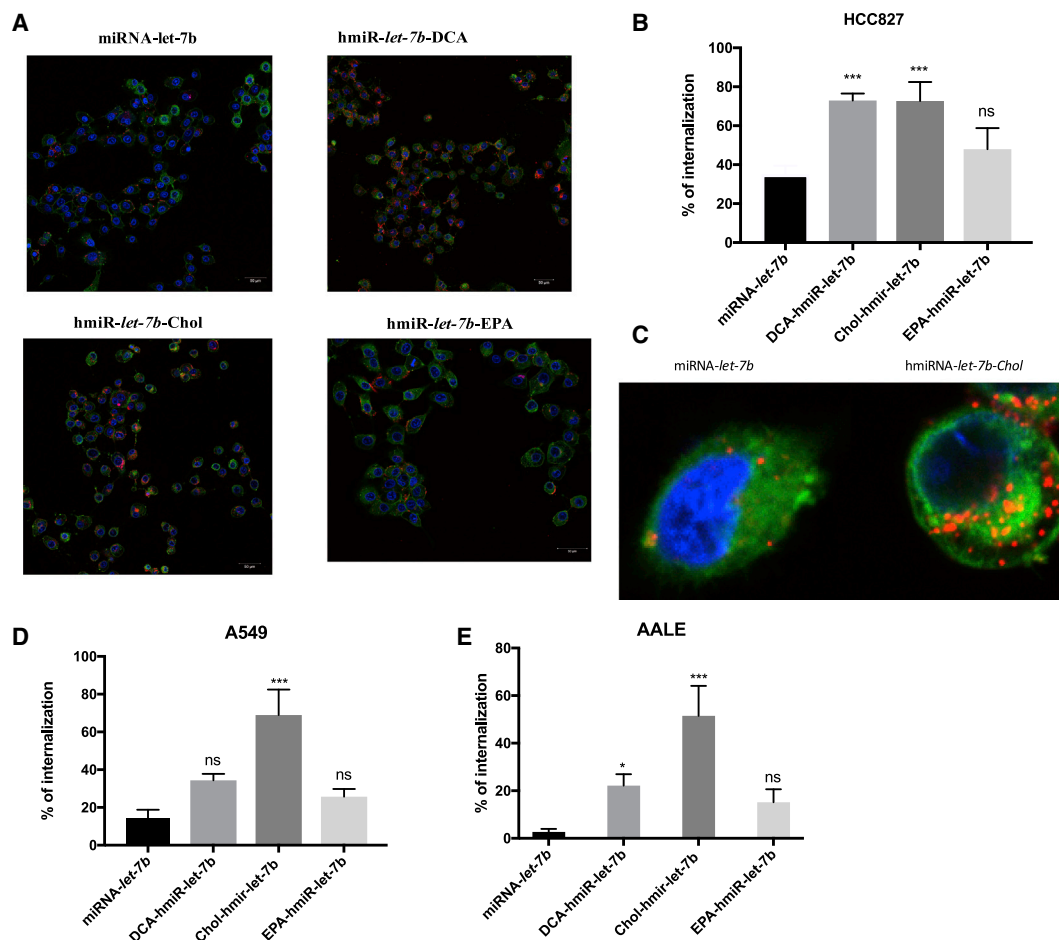

**Figure 2. hmiR-let-7b-conjugate internalization**

(A) Representative images of hmiR-let-7b-conjugate in the HCC827 cell line. (B) Internalization percentage of 0.4  $\mu$ M hmiR-let-7b conjugates in the HCC827 cell line after 24 h. \*\*\* $p < 0.005$ . Statistical analysis by one-way ANOVA was adjusted for multiple comparisons. Size bar: 50  $\mu$ m. (C) Magnified representative images of a miRNA-let-7b and hmiRNA-let-7b-Cholesterol-treated cell. (D) Internalization percentage of hmiR-let-7b conjugates in the A549 cell line after 24 h. (E) Internalization percentage of hmiR-let-7b conjugates in the AALE cell line after 24 h.

stability, and the 3' end of the passenger strand is conjugated to eicosapentaenoic acid (EPA), docosanoic acid (DCA), or Chol lipid to promote membrane binding and association. The 5' end of the passenger strand is conjugated to Cy3 for imaging. The strands backbone contains hydrophobic phosphorothioate linkages and promotes cellular uptake by a mechanism similar to that of antisense oligonucleotides. The presence of phosphorothioates, ribose modifications, and a lipid conjugate contributes to overall hydrophobicity and is essential for compound stabilization and efficient cellular internalization.

To evaluate how the structures of lipid conjugates affect miRNA distribution *in vitro* and *in vivo*, we synthesized three hmiRNAs-let-7b mimics conjugated with naturally occurring lipids, including EPA, the saturated fatty acid 22:0, DCA, and sterols Chol (Figure 1B). Each lipid conjugate was covalently attached to the 3' end of the miRNA passenger strand, which tolerates a range of covalent modifi-

cations.<sup>48</sup> The miRNA-let-7b used in these studies was fully chemically modified for maximal stability.

To test the stability of hmiR-let-7b as compared to the naked miRNA let-7b, both sequences were exposed to 50% serum, which mimic the physiological conditions. miRNA let-7b was highly unstable in the presence of serum, whereas hmiR-let-7b remained intact for up to 24 h (Figure 1C), suggesting that the modifications protect the miRNA mimic from serum nucleases.

#### hmiRNAs are Efficiently Internalized by HCC827 NSCLC Cells

Here, we evaluated whether hydrophobically modified miRNAs are efficiently internalized by NSCLC cell lines HCC827 and A549, and by normal lung cells, AALE. We found that when added to the culture medium, the Cy3-labeled hmiRNA-cholesterol conjugate was rapidly internalized into all three cell lines (Figure 2). Cy3-labeled hmiRNA-Cholesterol was observed in almost every cell in the culture,

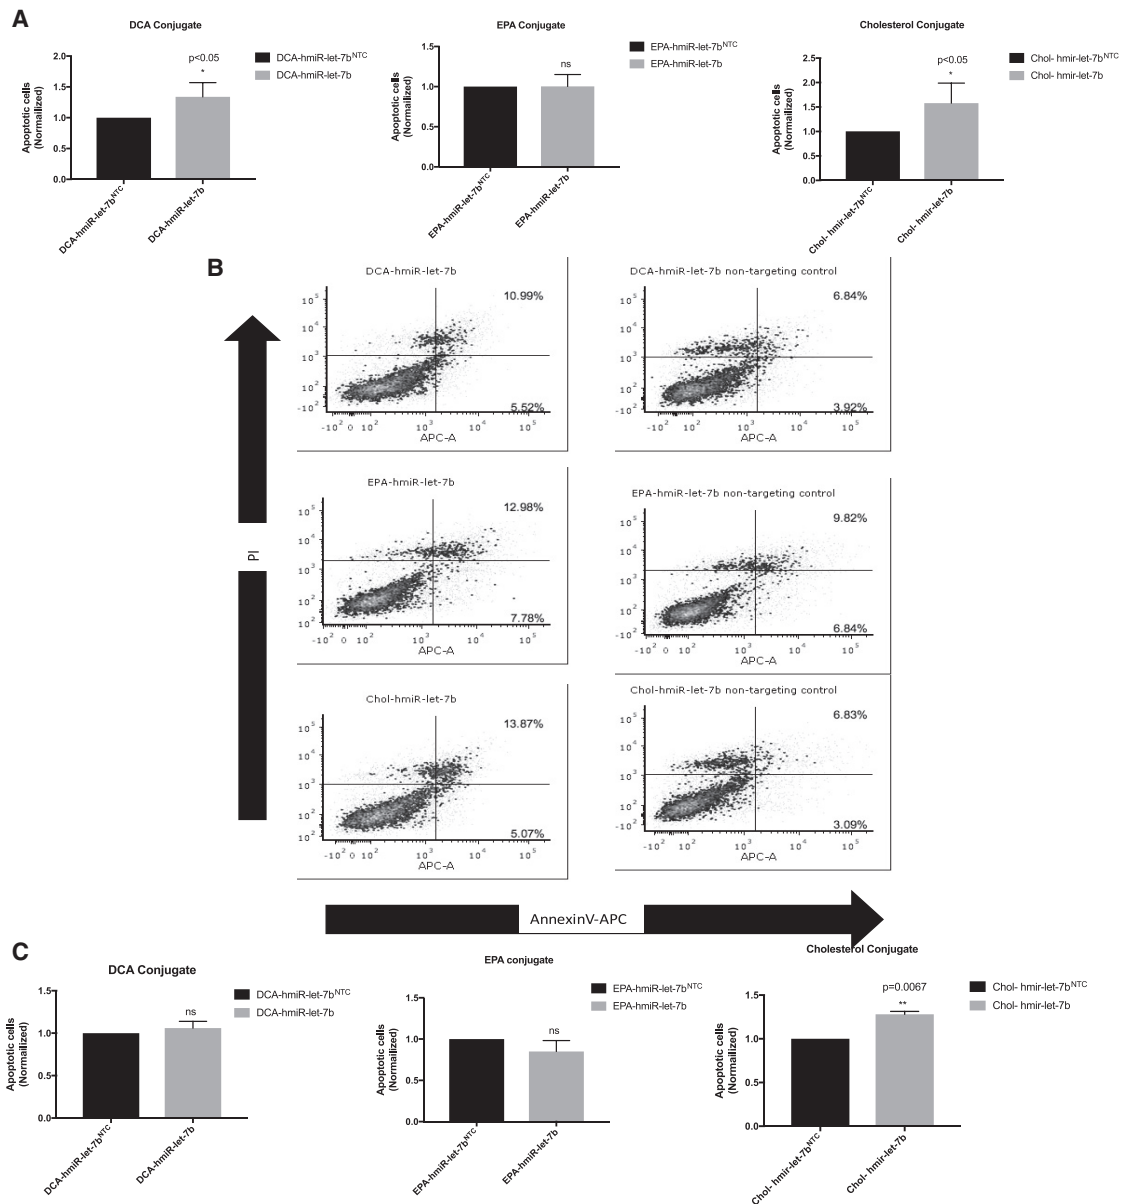

**Figure 3. hmiR-let-7b Conjugates Increase Apoptosis In Vitro**

(A) Mean of annexin V<sup>+</sup> PI<sup>+</sup> from at least three independent experiments at 72 h post-treatment with hmiR *let-7b* conjugate (DCA, EPA, and Chol) in the HCC827 cell line. \*p < 0.05, analyzed using t test. (B) Representative annexin V and PI scatterplots for HCC827 cells following treatment with hmiR-*let-7b* conjugates and NTC. Apoptotic cells were normalized to NTC from each individual experiment. (C) Mean of annexin V<sup>+</sup> PI<sup>+</sup> from at least three independent experiments at 72 h post-treatment with hmiR *let-7b* conjugate (DCA, EPA, and Cholesterol) in A549 cell line. \*\*p < 0.005.

demonstrating efficient and uniform uptake with 73%, 69%, and 51% for HCC827, A549, and AALE cells, respectively. Internalization of Cy3-labeled hmiRNA-DCA was observed frequently in the HCC827 cell line (73%), but less frequently in the normal lung cells and in A549 cells. The internalization of the EPA conjugate was more frequent than the naked miRNA-*let-7b* in all three cell lines, although this was not significant.

### hmiR-let-7b-Cholesterol Increases Apoptosis in HCC827 and A549 Cells

To further investigate the potential tumor suppressor role of hmiR-*let-7b* conjugates in HCC827 and A549 cells, we treated cells with 1  $\mu$ M hmiR-*let-7b* conjugate and a control hmiRNA non-targeting control (NTC) for 72 h. hmiRNA-NTC consisted of a double-stranded miRNA containing a sequence without any target gene. Cells

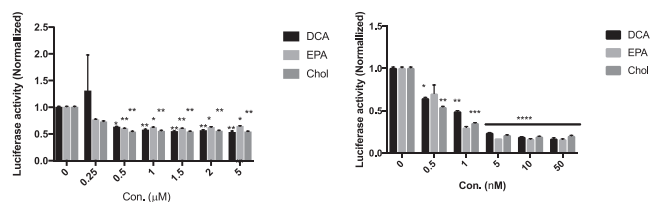

**Figure 4. Dose Response of HCC827 Cells to hmiR-*let-7b* Conjugates**

Renilla values were measured 72 h after treatment. Data points were normalized to untreated cells. (A) Passive delivery. (B) Lipid-mediated (lipo2000) delivery. \* $p < 0.05$ , \*\* $p < 0.005$ , \*\*\*\* $p < 0.0001$ . Means  $\pm$  SD. Statistical analysis was by two-way ANOVA adjusted for multiple comparisons.

then were labeled with annexin V-allophycocyanin (APC) and propidium iodide (PI) and analyzed using flow cytometry. A significant increase in apoptosis activity was observed with the cholesterol conjugate as compared to control hmiRNA-NTC in HCC827 and A549 cell lines (Figures 3A and 3C). The DCA and EPA conjugates showed less of an increase of apoptotic cells (Figures 3A and 3C). Representative scatterplots for hmiR-*let-7b* conjugates in HCC827 are shown in Figure 3B.

#### Delivery of hmiR-*let-7b* Conjugates Promotes *let-7b* Engagement in RISC

To validate the activity of hmiR-*let-7b* conjugates, we used a functional assay to monitor RISC/RNAi activity using a *let-7* sensor. Luciferase reporter assays were performed in HCC827 cells that express a *luc* reporter with perfect *let-7* complementary sites in its 3' UTR. Luciferase fluorescence levels in these cells are thus inversely correlated with *let-7* activity. To test whether hmiR-*let-7b* conjugates preserve their RNAi efficiency, HCC827 cells were co-transfected (lipid mediated) with the *luc* 3' UTR *let-7* sensor together with each conjugate separately using Lipofectamine 2000 in a range of concentrations of 0.5–100 nM. Following 72 h, luciferase activity was measured and showed a decrease of up to 80% and a dose response with all three conjugates (Figure 4B). This reduction in luciferase activity was not observed in untreated cells.

To further test self-delivery (passive delivery) efficacy of the three conjugates, cells were transfected with the *luc* 3' UTR *let-7* sensor on the first day, and the next day cells were treated with hmiR-*let-7b* conjugates (0.25–5  $\mu$ M). Following 72 h, luciferase activity was measured and showed a decrease up to 45% and a dose response with all three conjugates (Figure 4A). Thus, our cell-based experiments indicated a rapid reduction in luciferase activity in hmiR-*let-7b* conjugate-treated cells 72 h after treatment regardless of the method of delivery.

#### Lipid Conjugates Increase Endogenous *let-7* miRNA and Decrease Its Target Genes *In Vitro*

To confirm *in vitro* delivery of miRNA *let-7b*, we first treated HCC827 cells with EPA, DCA, or cholesterol hmiR-*let-7b* conjugates, and the levels of miR-*let-7b* and its target genes were quantified using quantitative real-time PCR. A significant increase in *let-7b* levels following

48 h of treatment was observed compared to the hmiR-NTC conjugate-treated cells, with a 2,000-fold change increase for cholesterol conjugate, 150-fold change increase for EPA, and a 2-fold change increase for DCA (Figure 5A). hmiR-*let-7b* conjugate delivery was active and potentially downregulated the *let-7* target gene *HMGA2*. Downregulation of this target gene ranged between 40% and 60% (Figure 5B). Treatment with a hmiR-NTC had no effect on the expression levels of the evaluated genes.

#### HmiR-*let-7b* Conjugate Distribution *In Vivo* after Subcutaneous Injection

We next determined the tissue-target specificity of the hmiR-*let-7b* conjugate *in vivo*. To this end, immunodeficient (nu/nu) mice bearing HCC827 tumors were treated with a single subcutaneous injection (20 mg/kg) of EPA, Cholesterol, DCA, or PBS. Mice were then sacrificed 24 h after administration of the conjugates, and tumors/organs (lung, liver, and spleen) were harvested. The miRNA passenger/sense strands were labeled at their 5' ends with a Cy3 fluorophore for qualitative analysis of tissue sections by fluorescence microscopy. We also quantified the absolute concentrations of *let-7b* guide/antisense strand in tissue using a peptide nucleic acid (PNA) hybridization assay and compared levels of miRNA in those tissues with the control group (qRT-PCR). As expected, conjugated hmiR-*let-7b* accumulated mostly in liver and spleen (Figure 6). We observed a clear relationship between miRNA lipophilicity and the amount of miRNA that accumulated in these tissues. High lipophilic hmiRNAs with DCA and cholesterol conjugates accumulated to higher levels in liver and spleen than did the low lipophilic miRNA-EPA conjugate, which accumulated less in the liver or spleen (PNA assay, absolute amount) (Figure 6A). Although the highest amounts of hmiR-*let-7b* were detected in liver and spleen, significant amounts of *let-7b* were detected in the tumor, with the highest amount with EPA and DCA conjugates (~8 ng miRNA per mg of tissue). The lowest levels of *let-7b* were in normal lung tissues. Taken together and as compared to DCA and Cholesterol conjugates, the hmiR-*let-7b*-EPA conjugate accumulates less in liver, spleen, and normal lung tissue and accumulates more in tumor, making it a potential drug delivery strategy for NSCLC. Similar results were observed in fluorescence microscopy analysis (Figure 6B).

#### EPA-hmiR-*let-7b* Conjugates Increased the Amount of Tumor *let-7b* miRNA and Enabled Functional Gene Silencing *In Vivo*

To determine whether EPA-conjugated hmiR-*let-7b* accumulates to levels sufficient for productive gene silencing, we injected mice subcutaneously with EPA-conjugated hmiR-*let-7b*. We injected the EPA conjugate at a dose of 20 mg/kg (seven mice per hmiRNA conjugate [hmiR-*let-7b* and non-targeting control (NTC)], twice a week for 21 days and sacrificed the mice 48 h after the last injection. We measured the amount of *let-7b* in the tumors by PNA hybridization assay. Although most of the miRNA was found in the kidney, we found that the concentration of *let-7b* in tumor was 250 ng of miRNA per mg of tissue (Figure 7A). We measured a 3-fold change of miRNA *let-7b* levels in tumors relative to hmiRNA-NTC (Figure 7B). Furthermore, the increase of *let-7b* levels in tumor-bearing mice treated with

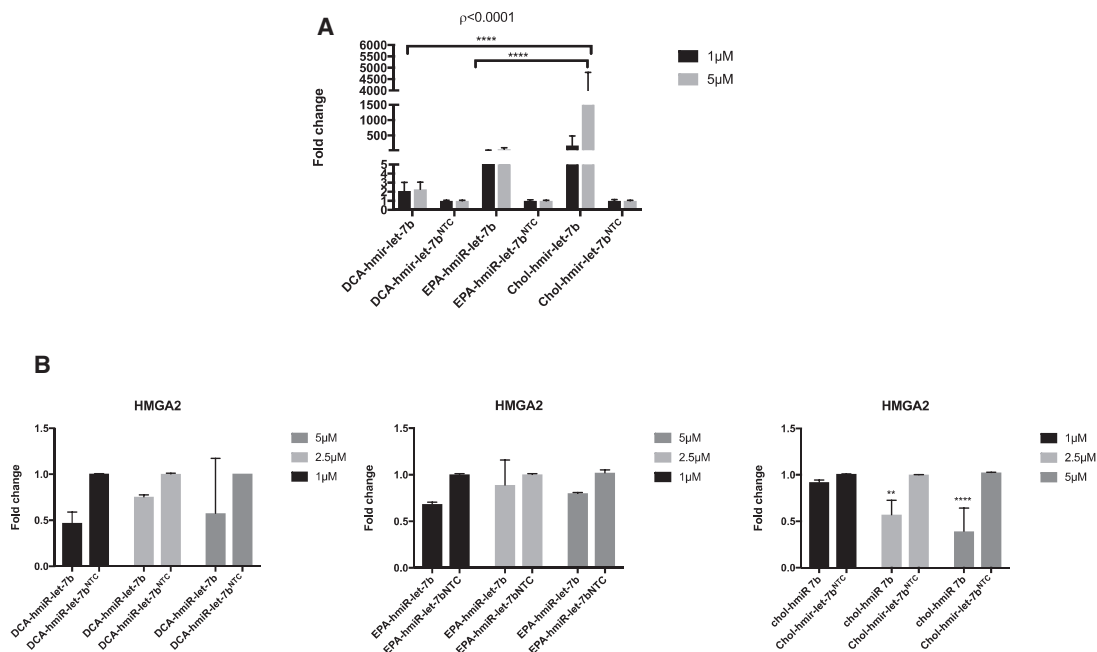

**Figure 5. Expression levels of *let-7b* and *HMGA2***

(A) The expression level of *let-7b*-5p in HCC827 48 h post-treatment with miRNA conjugates. Assays were performed in triplicate. miRNA *let-7b* levels were normalized to miRNA-423 levels. \*\*\*\* $p < 0.001$ . Means  $\pm$  SEM are shown. (B) Expression level of *HMGA2* in HCC827 48 h post-treatment with miRNA conjugates. Assays were performed in triplicate, and *HMGA2* mRNA was normalized to *GAPDH* mRNA levels. \*\* $p < 0.005$ , \*\*\*\* $p < 0.0001$ . Means  $\pm$  SD are shown. Statistical analysis was by two-way ANOVA adjusted for multiple comparisons

EPA-hmiR-*let-7b* resulted in 30% downregulation of *HMGA2* mRNA (*GAPDH*, serving as a control housekeeping gene) (Figure 7C). hmiRNA-NTC showed no significant reduction in target gene expression, indicating that the observed silencing is due to sequence-specific effects rather than the general chemical scaffold.

#### Effect of EPA-hmiR-*let-7b* on Tumor Growth and Ki-67 Immunoreactivity

We observed a small but not significant change in tumor size between the treatment and NTC arms of the xenograft experiment (Figure 8A). In addition, tumor samples from the treatment group and NTC treatment were examined histologically using standard H&E staining after OCT (optimal cutting temperature) fixation. In both treatment and control groups, the histological findings did not identify cellular structures significantly different between the groups (Figure S2).

In order to determine whether EPA-hmiR-*let-7b* is able to reduce the proliferation in xenograft tumors at 3.5 weeks post-treatment, in this study, Ki-67 expression was used to detect alterations in cell proliferation. Tumor sections from the two groups were stained using immunocytochemistry method with Ki-67, a proliferating marker (green), and Hoechst (blue). The results (Figures 8B and 8C) showed that EPA-hmiR-*let-7b* reduced the proliferative condition compared to the NTC control. As shown in Figure 8B, EPA-hmiR-*let-7b* decreased the ratio of Ki-67/Hoechst to  $14.21 \pm 0.378\%$  of the control treatment

( $p < 0.0001$ ). The result revealed that EPA-hmiR-*let-7b* treatment decreased the expression of Ki-67 when compared to EPA-hmiR-*let-7b* NTC (Figures 8B and 8C). These immunohistochemistry (IHC) studies suggested that EPA-hmiR-*let-7b* slowed proliferation of the tumor cells, but this effect did not result in a significant effect on tumor volume at 3.5 weeks post-treatment.

#### DISCUSSION

NSCLC represents about 85% of all lung cancers and is mostly diagnosed at an advanced stage.<sup>49</sup> Overexpression of miRNA mimics in cancer cells has been known as a potential therapeutic strategy for the last 10 years, including for lung cancer.<sup>15–17,50,51</sup> However, there are challenges in the translation of miRNAs into clinical applications, including low stability due to its degradation by endonucleases/exonucleases,<sup>52,53</sup> and lack of potent delivery to the cancer cells due to their negative charges.<sup>54</sup> Previous work has revealed that hydrophobic modifications to siRNAs improves their stability without a reduction in their efficacy,<sup>55</sup> while lipids are class of molecules that can be used to improve drug-targeted delivery.<sup>56,57</sup>

Our research in the present study addresses the potential of a novel therapeutic approach combining a lipid and hydrophobically modified *let-7b* miRNA that can be useful to target NSCLC with silencing of *HMGA2* mRNA. Indeed, the presence of high levels of *HMGA2* mRNA has been observed with lung cancer.<sup>2,5,6,58,59</sup>

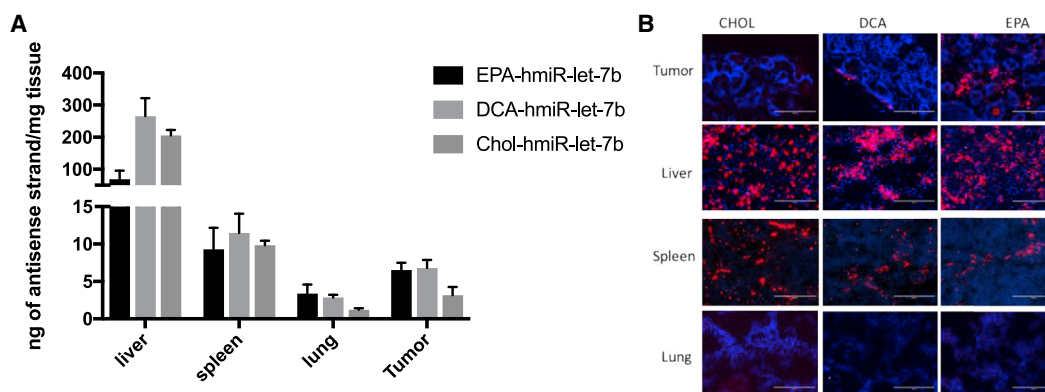

**Figure 6. MiRNA-*let-7b* expression *in vivo* after 24 hours**

(A) Quantification of *Let-7b* antisense strand in liver, spleen, lung, and tumor after 24 h subcutaneously at 20 mg/kg (PNA hybridization assay). (B) Fluorescence images of Cy3-labeled DCA-, EPA-, and Cholesterol-conjugated miRNAs in liver, lung, spleen, and tumor. Scale bars, 200  $\mu$ m.

Here, we show that cell-targeting lipids, which are crucial for miRNA retention in the body, might be used as a carrier for therapeutic miRNAs *in vivo*. Lipids with different lipophilicity, Cholesterol, EPA, and DCA were covalently linked<sup>56</sup> to *let-7b* miRNA, a tumor suppressor miRNA.<sup>60</sup> To test sequence specificity, we also conjugated the same lipid to NTC miRNA.

A major limitation of RNA-based drugs *in vivo* is the fast degradation (few minutes) of natural ribonucleotide in serum or blood. In order to keep the RNA intact and protect it from degradation, we synthesized miRNA mimics with 2'-F and 2'-OMe modifications. We evaluated the internalization of three lipid conjugates in three cell lines, HCC827, A549, and AALE, and found that the Cholesterol conjugate was internalized in all three cell lines, while the EPA conjugate and DCA conjugate were less well internalized.

We showed that *in vitro* in HCC827 cells, hmiR-*let-7b* (the silencing moiety with lipid conjugates) preserved their activity, resulting in high levels of miR-*let-7b* and silencing of a well-known *let-7b* oncogene target, *HMGA2*. The Cholesterol conjugate appeared to be best for silencing *in vitro*. Interestingly, at 1  $\mu$ M the silencing for the Cholesterol conjugate was not significant even though the miRNA levels were high. This could be explained by the known observation that the degree of silencing does not always correlate with the level of compound accumulation.<sup>44</sup> The structure of the conjugate (EPA, cholesterol, or DCA) may define productive silencing by impacting cellular internalization and/or endosomal escape.

Moreover, we have found that overexpression of hmiR-*let-7b*-cholesterol in the target cell lines HCC827 and A549 was correlated with an increase in apoptotic cells and endogenous miRNA *let-7b*, and this compound was again found to be the best candidate *in vitro*. The AALE cell line was not tested because of difficulty with cell growth, but we can assume that the degree of apoptosis would be less, as the internalization in this cell line was also less than in the other two cell lines.

Our *in vivo* biodistribution study with the three lipid conjugates revealed a different result, and hmiR-*let-7b*-EPA was found to be the best candidate. Its injection in three mice showed the highest expression of miRNA *let-7b* in tumor tissue. With successive subcutaneous administration of the optimized lipid (EPA)-hmiR-*let-7b* construct, we noticed detectable uptake into target HCC827 tumors *in vivo*. The injected amount of the lipid-conjugated miRNAs *let-7b* was delivered mostly to primary clearance tissues, including liver, kidney, and spleen. Nevertheless, lipid-miRNA *let-7b* conjugate delivered to HCC827 tumor cells was capable of silencing *HMGA2* mRNA that is overexpressed in the disease tumor tissue. Furthermore, hmiR-*let-7b*-EPA was able to reduce tumor cell proliferation.

## Conclusion

Our study demonstrates that fully hydrophobically modified miRNAs are effective in gene silencing, and thus they might be a useful chemical compound in therapeutic studies. Direct conjugation of RNAi to a targeting agent is emerging as a promising alternative to nanoparticle-based cargoes for selective delivery, especially to the liver.<sup>61,62</sup> However, many lipid delivery approaches attempt to target tissues other than the liver. We show lipid-targeted delivery of a miRNA with biologic activity to tumor tissue *in vivo* as a proof of concept for future progress of other targeted miRNA-based therapies. Although our studies were in the context of cancer, this application can be applied to different fields of RNA therapeutics by specifying a safe, effective strategy to deliver functional miRNAs to target tissues.

## MATERIALS AND METHODS

### Cell Line

The HCC827 cell line was obtained from Dr. S. Kobayashi (Beth Israel Deaconess Medical Center/Harvard Medical School, USA). A549 cells were obtained from ATCC. AALE cells were a gift from Matthew Meyerson's laboratory. Cells were grown in 90% DMEM supplemented with 10% fetal bovine serum (FBS) and 1  $\times$  penicillin/streptomycin solution. Media and supplements were purchased from

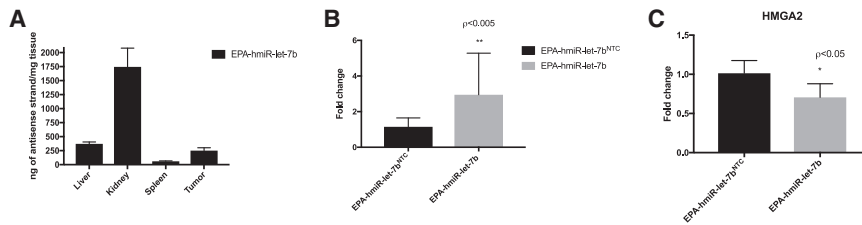

**Figure 7. *let-7b* and *HMGA2* expression levels in vivo**

(A) Quantification of EPA-*let-7b* miRNA in liver, kidney, spleen, and tumor after 3.5 weeks subcutaneously at  $2 \times 20$  mg/kg per week (PNA hybridization assay,  $n = 7$ ). (B) qRT-PCR expression of EPA-miR-*let-7b*-5p expression. miRNA levels were normalized to miRNA-423 levels. (C) *HMGA2* mRNA expression levels in tumors. mRNA levels were normalized to GAPDH mRNA levels. \* $p < 0.05$ , \*\* $p < 0.005$ . Statistical analysis was by two-way ANOVA adjusted for multiple comparisons

Thermo Fisher (Waltham, MA, USA). All cells were maintained at  $37^{\circ}\text{C}$  in 5%  $\text{CO}_2$ .

### Oligonucleotide Synthesis, Deprotection, and Purification

Oligonucleotides were synthesized following standard protocols on a MerMade 12 (BioAutomation, Irving, TX, USA). Sense strands were synthesized at 1- or 2- $\mu\text{mol}$  scales on synthesized fatty acid-functionalized CPG supports.<sup>44</sup> Antisense strands were synthesized at 10- $\mu\text{mol}$  scales on CPG functionalized with Unylinker (ChemGenes, Wilmington, MA, USA). 2'-*O*-methyl phosphoramidites (ChemGenes, Wilmington, MA, USA), 2'-fluoro phosphoramidites (BioAutomation, Irving, TX, USA), Cy3-labeled phosphoramidites (GenePharma, Shanghai, China), and custom synthesized (*E*)-vinylphosphonate phosphoramidites were used.<sup>63</sup> Oligonucleotides were removed from CPG and deprotected using 40% aqueous methylamine, purified by high-performance liquid chromatography (HPLC), and desalted by size-exclusion chromatography. Oligonucleotide purity and identity were determined by liquid chromatography-mass spectrometry (LC-MS) analysis on an Agilent 6530 Accurate-Mass Q-TOF LC/MS (Agilent Technologies, Santa Clara, CA, USA). The NTC sequence has the same modification and lipids conjugates: antisense, Pi-UPsU PsAAUCUCUUUACUGAUAUPsAPsU; sense, lipid-CPsAPsUAUA UCAGUAAAGAGAUUPsAPsA-Cy3 (X, 2'-*O*Me nucleotide; X, 2'-F nucleotide; Ps, phosphothioate).

### Live Cell Imaging

To monitor live cell hmiRNA internalization, cells were plated at a density of  $0.2 \times 10^5$  cells per well on a chambered glass-bottom dish. Imaging was performed in phenol red-free medium (Thermo Fisher, Waltham, MA, USA). Cells were treated with 0.4  $\mu\text{mol/L}$  Cy3-labeled hmiRNA, and live cell imaging was performed after 24 h by a Zeiss LSM 880 confocal microscope at the Confocal Imaging Core of Beth Israel Deaconess Medical Center.

### hmiR-*let-7b* Stability in Serum

miRNA duplex at 0.5 mM was diluted in 50% FBS with a final concentration of 5  $\mu\text{M}$  and incubated at  $37^{\circ}\text{C}$ . At the desired time points, an aliquot from the assay tube was transferred to a fresh tube containing GreenGlo (5  $\mu\text{L}$ , Thomas Scientific, Swedesboro, NJ, USA). Samples were run on 4%–20% PAGE and analyzed by a Bio-Rad camera.

### Flow Cytometry Analysis of Apoptosis

Cultured cells were harvested by trypsinization and washed with  $1 \times$  PBS. For each sample,  $1 \times 10^6$  cells were stained with the annexin V-APC/PI apoptosis detection kit (BD Biosciences, San Jose, CA, USA) according to the manufacturer's instructions, and then analyzed using fluorescence-activated cell sorting (FACS; BD FACSCanto II, BD Biosciences, CA, USA).

### Activity Study in psiCHECK-2 System

The psiCHECK constructs contained a single copy of matched sequence complementary to the miRNA guide or one copy of a mismatched sequence. For testing the activity of miRNA,  $1 \times 10^5$  human HCC827 cells were seeded in 24-well plates. Cells were then incubated in a  $37 \pm 1^{\circ}\text{C}$ , 5%  $\text{CO}_2$  incubator for 24 h. The next day the cells were transfected with 500 ng of *let-7* luciferase reporter, which carries the wild-type miR-*let-7* sequence (Addgene plasmid no. 50827) using Lipofectamine 2000 reagent, according to the manufacturer's procedure, and incubated for 24 h at  $37 \pm 1^{\circ}\text{C}$  and 5%  $\text{CO}_2$ . Following incubation, cells were transfected (using Lipofectamine 2000 reagent) or treated with hmiRNA conjugates at final concentrations ranging from 0.5 to 100 nM (lipid mediated) or 0.25 to 5  $\mu\text{M}$  (passive delivery) in a 500- $\mu\text{L}$  final volume. Cells were then incubated for 72 h at  $37 \pm 1^{\circ}\text{C}$  following assessment of Renilla and firefly luciferase activities. Activities were measured in each of the miRNA-transfected or treated samples using the Dual-Luciferase assay kit (Promega, catalog no. E1960) according to the manufacturer's procedure. Renilla luciferase activity value was divided by Firefly luciferase activity value for each sample (normalization).

### RNA Isolation and miRNA Expression Analyses Using qPCR

HCC827 derived tumors from Nu/Nu mice (NU-Foxn1nu; Jackson Laboratory) were collected in tubes and stored at  $-80^{\circ}\text{C}$ . Tumor and tissues were ground and placed in 400  $\mu\text{L}$  of TRIzol. 100  $\mu\text{L}$  of RNA was extracted using a Direct-zol RNA Minirep kit (Zymo Research) according to the manufacturer's instructions.

### qRT-PCR

Total RNA from the HCC827 cell line or tumors, lungs, livers, and spleen was isolated using the Direct-zol RNA MiniPrep Plus kit (Zymo Research) according to the vending company's instructions. RNA quantification was estimated with a DS-11 spectrophotometer (DeNovix). For RT-PCR detection of *let-7* mRNA target genes, 200–500 ng of RNA was reverse transcribed with a TaqMan miRNA



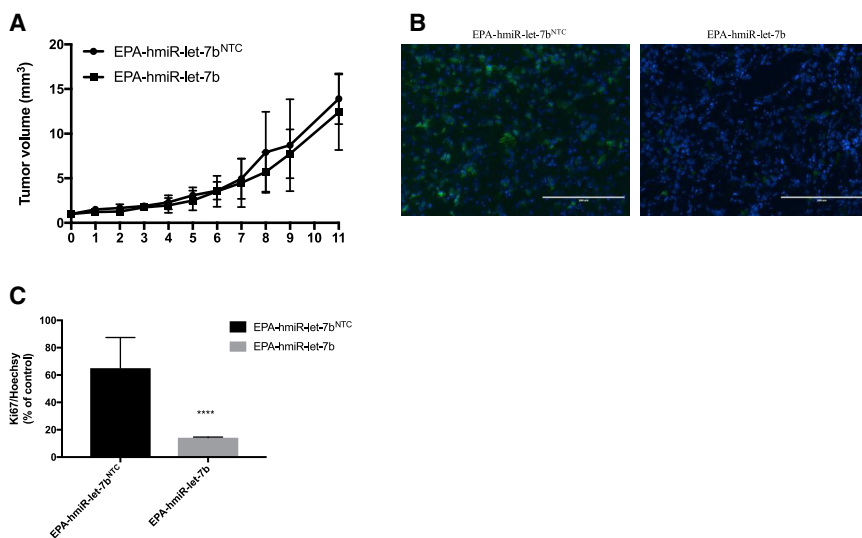

**Figure 8. HCC827 cell proliferation *in vivo***

(A) Tumor volume. (B) The effect of EPA-hmiR-*let-7b* on the cell proliferation was investigated by antibody against Ki-67. Representative images from sections of the treated tumors are shown. (C) Quantification of the intensity of Ki-67 and Hoechst staining. Images were captured at  $\times 20$  magnification from at least four randomly selected fields for each of six independent mice. \*\*\*\* $p < 0.0005$ , analyzed using a t test. Size bar: 200  $\mu\text{m}$ .

assay (Applied Biosystems, Foster City, CA, USA) with the following conditions: 42°C for 60 min and 85°C for 5 min. For RT-PCR detection of the *let-7b* guide strand, 10 ng of purified RNA was reverse transcribed using the *let-7b* TaqMan miRNA assay (Applied Biosystems, Foster City, CA, USA) with the following conditions: 42°C for 15 min and 85°C for 5 min. Gene and *let-7b* expression levels were determined by real-time PCR using Taq polymerase reagents (Invitrogen) on the LightCycler 480 II (Roche). TaqMan gene expression assays (Applied Biosystems) were used with the following cycling conditions: 95°C for 1 min (initial denaturation), then 45 cycles of 95°C for 5 s, 60°C for 30 s. The GAPDH mRNA or miRNA 423 was amplified as an internal reference. For the *in vivo* biodistribution study, levels of *let-7b* were normalized to mice treated with PBS.

#### PNA Hybridization Assay

Levels of the hmiRNA guide (antisense) strand in tumor, liver, spleen, kidney, and lung were measured by a PNA hybridization assay. In this assay, a fully complementary Cy3-labeled PNA probe was used to hybridize the antisense strand of hmiRNA. Briefly, tumor, liver, spleen, kidney, and lung samples were lysed and digested in 200  $\mu\text{L}$  of QG homogenizing solution (catalog no. QG0517; Affymetrix) containing 2  $\mu\text{L}$  of proteinase K (20 mg/mL). SDS was precipitated using 30  $\mu\text{L}$  of potassium chloride (3 mol/L) per sample and centrifuged at  $4,000 \times g$  for 15 min. Supernatants were then diluted in 150 mL of hybridization buffer (50 mM Tris, 10% Acetonitril, pH 8.8) containing 33 nM (5 pmol/150 mL of total sample) of Cy3-labeled PNA (PNABio, Thousand Oaks, CA, USA) and transferred to a PCR 96-well plate (catalog no. AB-0800/W; Thermo Scientific). Annealing was carried out on a Bio-Rad C1000 thermal cycler using the following protocol: 90°C for 15 min and 50°C for 15 min. Plates were then loaded into an Agilent Technologies 1260 Infinity Quad-pump HPLC system with a 1260 HiP ALS autosampler. Samples were run through a DNAPac PA100 anion exchange column (Thermo Fisher Scientific) and detected by a 1260 FLD fluorescent detector. The mobile phase consisted of buffer A (50% water, 50% ACN, 25 mM Tris-HCl

[pH 8.5], and 1 mM EDTA) and buffer B (800 mM NaClO<sub>4</sub> in buffer A). A steep gradient of buffer B (10%–100% within 2.5 min) was used for elution of guide strand-PNA hybrids. The Cy3 signal (550 nm excitation/570 nm emission) was monitored and recorded, and peaks were integrated to obtain the area under the curve (AUC). Final concentrations were as-

certained by correlating AUCs obtained from experimental samples with a corresponding calibration curve. Calibration curves were generated by spiking known amounts of the respective hmiRNA conjugate into tissue lysates derived from an untreated animal. Spiked samples for calibration and experimental samples were processed and analyzed side by side under the same laboratorial conditions.

#### Tumor Histology and Imaging

Tumor tissues were fixed in OCT. Embedding and sectioning were processed by the Histology Core of Beth Israel Deaconess Medical Center (Boston, MA, USA). 4- $\mu\text{m}$  tissue sections were prepared and stained with Hoechst 443300 and Ki-67 antibody according to standard protocols. Phase-contrast and fluorescent images were acquired on an EVOS FL cell imaging system with a 4 $\times$ , 10 $\times$ , or 20 $\times$  objective.

#### Lung Cancer Xenografts, Biodistribution, and Tumor Growth

All mice were maintained at Beth Israel Deaconess Medical Center in accordance with Institutional Animal Care and Use Committee guidelines. For single-dose studies, subcutaneous tumors were induced in female Nu/Nu mice (NU-Foxn1nu; 6 weeks;  $n = 12$ ). Human HCC827 NSCLC cells were cultured in DMEM media following standard tissue culture procedures. HCC827 cells were trypsinized, counted, and subcutaneously injected into the left flank of 6-week-old nude mice (Jackson Laboratory, Bar Harbor, ME, USA) using  $1 \times 10^6$  cells in 100  $\mu\text{L}$  of DMEM with 50% Matrigel (BD Biosciences, San Jose, CA, USA) per injection. When tumors reached an average volume of 500  $\text{mm}^3$  (caliper measurements were taken every 2 days, and tumor volume was calculated using the formula  $V = \text{length} \times \text{width}^2/2$ ), 100  $\mu\text{L}$  of synthetic hmiRNA-*let-7b* conjugates was delivered subcutaneously. Mice were sacrificed by CO<sub>2</sub> inhalation after 24 h, and tumors, lungs, livers, and spleens were collected and prepared for histology and RNA isolation. All animal experiments were performed under an Institutional Animal Care and Use Committee-approved animal study protocol.

### Statistical Analysis

Data represent the results of three independent experiments. Differences between groups were analyzed using one-way or two-way ANOVA analysis and expressed as mean  $\pm$  SD from at least three separate experiments. A t test was used to compare between two groups. For all tests,  $p < 0.05$  was considered to be statistically significant (\* $p < 0.05$ , \*\* $p < 0.005$ , \*\*\*\* $p < 0.0001$ ).

### SUPPLEMENTAL INFORMATION

Supplemental Information can be found online at <https://doi.org/10.1016/j.omtn.2019.11.008>.

### AUTHOR CONTRIBUTIONS

M.S. conducted all *in vitro* and *in vivo* experiments. A.B. synthesized all compounds and performed PNA hybridization assay measurements. J.L. assisted with real-time qPCR experiments. M.-E.G., E.A., and R.D.C. assisted with *in vivo* experiment. M.S. wrote the manuscript.

### CONFLICTS OF INTEREST

A.K. owns stock of RXi Pharmaceuticals and Advirna. F.J.S. discloses financial interests and SAB roles with Mira DX and MiRNA Therapeutics. The remaining authors declare no competing interests.

### ACKNOWLEDGMENTS

We thank A.K. and A.B. for critical reading of this manuscript. F.J.S. acknowledges NIH-YALE SPORE in Lung Cancer P50CA196530 and the NCI Outstanding Investigator Award (R35CA232105). Additional support to F.J.S. was provided by the P50CA196530-03S1 and support from the Ludwig Center at Harvard.

### REFERENCES

- Durso, M., Gaglione, M., Piras, L., Mercurio, M.E., Terreri, S., Olivieri, M., Marinelli, L., Novellino, E., Incoronato, M., Grieco, P., et al. (2016). Chemical modifications in the seed region of miRNAs 221/222 increase the silencing performances in gastrointestinal stromal tumor cells. *Eur. J. Med. Chem.* *111*, 15–25.
- Dai, F.-Q., Li, C.-R., Fan, X.-Q., Tan, L., Wang, R.-T., and Jin, H. (2019). miR-150-5p inhibits non-small-cell lung cancer metastasis and recurrence by targeting HMGA2 and  $\beta$ -catenin signaling. *Mol. Ther. Nucleic Acids* *16*, 675–685.
- Di Cello, F., Hillion, J., Hristov, A., Wood, L.J., Mukherjee, M., Schuldenfrei, A., Kowalski, J., Bhattacharya, R., Ashfaq, R., and Resar, L.M. (2008). HMGA2 participates in transformation in human lung cancer. *Mol. Cancer Res.* *6*, 743–750.
- Kumar, M.S., Armenteros-Monterroso, E., East, P., Chakravorty, P., Matthews, N., Winslow, M.M., and Downward, J. (2015). Retraction. *Nature* *523*, 370.
- Naghizadeh, S., Mansoori, B., Mohammadi, A., Kafili, H.S., Mousavi, Z., Sakhinia, E., and Baradaran, B. (2019). Effects of HMGA2 gene downregulation by siRNA on lung carcinoma cell migration in A549 cell lines. *J. Cell. Biochem.* *120*, 5024–5032.
- Sarhadi, V.K., Wikman, H., Salmenkivi, K., Kuosma, E., Sioris, T., Salo, J., Karjalainen, A., Knuutila, S., and Anttila, S. (2006). Increased expression of high mobility group A proteins in lung cancer. *J. Pathol.* *209*, 206–212.
- Zappa, C., and Mousa, S.A. (2016). Non-small cell lung cancer: current treatment and future advances. *Transl. Lung Cancer Res.* *5*, 288–300.
- Calin, G.A., and Croce, C.M. (2006). MicroRNA signatures in human cancers. *Nat. Rev. Cancer* *6*, 857–866.
- How, C., Pintilie, M., Bruce, J.P., Hui, A.B.Y., Clarke, B.A., Wong, P., Yin, S., Yan, R., Waggott, D., Boutros, P.C., et al. (2015). Developing a prognostic micro-RNA signature for human cervical carcinoma. *PLoS ONE* *10*, e0123946.
- Adams, B.D., Kasinski, A.L., and Slack, F.J. (2014). Aberrant regulation and function of microRNAs in cancer. *Curr. Biol.* *24*, R762–R776.
- Cheng, C.J., Bahal, R., Babar, I.A., Pincus, Z., Barrera, F., Liu, C., Svoronos, A., Braddock, D.T., Glazer, P.M., Engelman, D.M., et al. (2015). MicroRNA silencing for cancer therapy targeted to the tumour microenvironment. *Nature* *518*, 107–110.
- Shah, M.Y., Ferrajoli, A., Sood, A.K., Lopez-Berestein, G., and Calin, G.A. (2016). microRNA therapeutics in cancer—an emerging concept. *EBioMedicine* *12*, 34–42.
- Higgs, G., and Slack, F. (2013). The multiple roles of microRNA-155 in oncogenesis. *J. Clin. Bioinforma.* *3*, 17.
- Zhou, K., Liu, M., and Cao, Y. (2017). New insight into microRNA functions in cancer: oncogene-microRNA-tumor suppressor gene network. *Front. Mol. Biosci.* *4*, 46.
- Esquela-Kerscher, A., Trang, P., Wiggins, J.F., Patrawala, L., Cheng, A., Ford, L., Weidhaas, J.B., Brown, D., Bader, A.G., and Slack, F.J. (2008). The *let-7* microRNA reduces tumor growth in mouse models of lung cancer. *Cell Cycle* *7*, 759–764.
- Trang, P., Medina, P.P., Wiggins, J.F., Ruffino, L., Kelnar, K., Omotola, M., Homer, R., Brown, D., Bader, A.G., Weidhaas, J.B., and Slack, F.J. (2010). Regression of murine lung tumors by the *let-7* microRNA. *Oncogene* *29*, 1580–1587.
- Trang, P., Wiggins, J.F., Daige, C.L., Cho, C., Omotola, M., Brown, D., Weidhaas, J.B., Bader, A.G., and Slack, F.J. (2011). Systemic delivery of tumor suppressor microRNA mimics using a neutral lipid emulsion inhibits lung tumors in mice. *Mol. Ther.* *19*, 1116–1122.
- Ryther, R.C.C., Flynt, A.S., Phillips, J.A., 3rd, and Patton, J.G. (2005). siRNA therapeutics: big potential from small RNAs. *Gene Ther.* *12*, 5–11.
- Zhou, J., and Rossi, J. (2017). Aptamers as targeted therapeutics: current potential and challenges. *Nat. Rev. Drug Discov.* *16*, 181–202.
- Esau, C.C., and Monia, B.P. (2007). Therapeutic potential for microRNAs. *Adv. Drug Deliv. Rev.* *59*, 101–114.
- McDermott, A., Heneghan, H., Miller, N., and Kerin, M. (2011). The therapeutic potential of microRNAs: disease modulators and drug targets. *Pharm Res.* *28*, 3016–3029.
- Juliano, R.L. (2016). The delivery of therapeutic oligonucleotides. *Nucleic Acids Res.* *44*, 6518–6548.
- Kortylewski, M., and Nechaev, S. (2014). How to train your dragon: targeted delivery of microRNA to cancer cells *in vivo*. *Mol. Ther.* *22*, 1070–1071.
- Wang, Y., Miao, L., Satterlee, A., and Huang, L. (2015). Delivery of oligonucleotides with lipid nanoparticles. *Adv. Drug Deliv. Rev.* *87*, 68–80.
- Zhao, Y., and Huang, L. (2014). Lipid nanoparticles for gene delivery. *Adv. Genet.* *88*, 13–36.
- Campani, V., De Rosa, G., Misso, G., Zarone, M.R., and Grimaldi, A. (2016). Lipid nanoparticles to deliver miRNA in cancer. *Curr. Pharm. Biotechnol.* *17*, 741–749.
- Wang, H., Liu, S., Jia, L., Chu, F., Zhou, Y., He, Z., Guo, M., Chen, C., and Xu, L. (2018). Nanostructured lipid carriers for microRNA delivery in tumor gene therapy. *Cancer Cell Int.* *18*, 101.
- Akinc, A., Querbes, W., De, S., Qin, J., Frank-Kamenetsky, M., Jayaprakash, K.N., Jayaraman, M., Rajeev, K.G., Cantley, W.L., Dorkin, J.R., et al. (2010). Targeted delivery of RNAi therapeutics with endogenous and exogenous ligand-based mechanisms. *Mol. Ther.* *18*, 1357–1364.
- Shi, B., Keough, E., Matter, A., Leander, K., Young, S., Carlini, E., Sachs, A.B., Tao, W., Abrams, M., Howell, B., and Sepp-Lorenzino, L. (2011). Biodistribution of small interfering RNA at the organ and cellular levels after lipid nanoparticle-mediated delivery. *J. Histochem. Cytochem.* *59*, 727–740.
- Baumann, V., and Winkler, J. (2014). miRNA-based therapies: strategies and delivery platforms for oligonucleotide and non-oligonucleotide agents. *Future Med. Chem.* *6*, 1967–1984.
- Zhang, Y., Wang, Z., and Gemeinhart, R.A. (2013). Progress in microRNA delivery. *J. Control. Release* *172*, 962–974.
- Nishina, K., Unno, T., Uno, Y., Kubodera, T., Kanouchi, T., Mizusawa, H., and Yokota, T. (2008). Efficient *in vivo* delivery of siRNA to the liver by conjugation of  $\alpha$ -tocopherol. *Mol. Ther.* *16*, 734–740.
- Orellana, E.A., Tennesi, S., Rangasamy, L., Lyle, L.T., Low, P.S., and Kasinski, A.L. (2017). FolamiRs: ligand-targeted, vehicle-free delivery of microRNAs for the treatment of cancer. *Sci. Transl. Med.* *9*, eam9327.

34. Wolfrum, C., Shi, S., Jayaprakash, K.N., Jayaraman, M., Wang, G., Pandey, R.K., Rajeev, K.G., Nakayama, T., Charrise, K., Ndungo, E.M., et al. (2007). Mechanisms and optimization of in vivo delivery of lipophilic siRNAs. *Nat. Biotechnol.* 25, 1149–1157.
35. Deleavey, G.F., and Damha, M.J. (2012). Designing chemically modified oligonucleotides for targeted gene silencing. *Chem. Biol.* 19, 937–954.
36. Bramsen, J.B., and Kjems, J. (2012). Development of therapeutic-grade small interfering RNAs by chemical engineering. *Front. Genet.* 3, 154.
37. Corey, D.R. (2007). Chemical modification: the key to clinical application of RNA interference? *J. Clin. Invest.* 117, 3615–3622.
38. Ma, J.-B., Yuan, Y.-R., Meister, G., Pei, Y., Tuschl, T., and Patel, D.J. (2005). Structural basis for 5'-end-specific recognition of guide RNA by the *A. fulgidus* Piwi protein. *Nature* 434, 666–670.
39. Parmar, R., Willoughby, J.L.S., Liu, J., Foster, D.J., Brigham, B., Theile, C.S., Charisse, K., Akinc, A., Guidry, E., Pei, Y., et al. (2016). 5'-(E)-vinylphosphonate: a stable phosphate mimic can improve the RNAi activity of siRNA-GalNAc conjugates. *ChemBioChem* 17, 985–989.
40. Shmushkovich, T., Monopoli, K.R., Homsy, D., Leyfer, D., Betancur-Boissel, M., Khvorova, A., and Wolfson, A.D. (2018). Functional features defining the efficacy of cholesterol-conjugated, self-deliverable, chemically modified siRNAs. *Nucleic Acids Res.* 46, 10905–10916.
41. Lennox, K.A., Owczarzy, R., Thomas, D.M., Walder, J.A., and Behlke, M.A. (2013). Improved performance of anti-miRNA oligonucleotides using a novel non-nucleotide modifier. *Mol. Ther. Nucleic Acids* 2, e117.
42. Alterman, J.F., Hall, L.M., Coles, A.H., Hassler, M.R., Didiot, M.-C., Chase, K., Abraham, J., Sottosanti, E., Johnson, E., Sapp, E., et al. (2015). Hydrophobically modified siRNAs silence huntingtin mRNA in primary neurons and mouse brain. *Mol. Ther. Nucleic Acids* 4, e266.
43. Biscans, A., Coles, A., Echeverria, D., and Khvorova, A. (2019). The valency of fatty acid conjugates impacts siRNA pharmacokinetics, distribution, and efficacy in vivo. *J. Control. Release* 302, 116–125.
44. Biscans, A., Coles, A., Haraszti, R., Echeverria, D., Hassler, M., Osborn, M., and Khvorova, A. (2019). Diverse lipid conjugates for functional extra-hepatic siRNA delivery in vivo. *Nucleic Acids Res.* 47, 1082–1096.
45. Ly, S., Navaroli, D.M., Didiot, M.-C., Cardia, J., Pandarinathan, L., Alterman, J.F., Fogarty, K., Standley, C., Lifshitz, L.M., Bellve, K.D., et al. (2017). Visualization of self-delivering hydrophobically modified siRNA cellular internalization. *Nucleic Acids Res.* 45, 15–25.
46. Lee, Y.S., and Dutta, A. (2007). The tumor suppressor microRNA *let-7* represses the HMGA2 oncogene. *Genes Dev.* 21, 1025–1030.
47. Shi, G., Perle, M.A., Mittal, K., Chen, H., Zou, X., Narita, M., Hernando, E., Lee, P., and Wei, J.J. (2009). *Let-7* repression leads to HMGA2 overexpression in uterine leiomyosarcoma. *J. Cell. Mol. Med.* 13 (9B), 3898–3905.
48. Tai, W. (2019). Current aspects of siRNA bioconjugate for in vitro and in vivo delivery. *Molecules* 24, E2211.
49. Molina, J.R., Yang, P., Cassivi, S.D., Schild, S.E., and Adjei, A.A. (2008). Non-small cell lung cancer: epidemiology, risk factors, treatment, and survivorship. *Mayo Clin. Proc.* 83, 584–594.
50. Hosseinahli, N., Aghapour, M., Duijf, P.H.G., and Baradaran, B. (2018). Treating cancer with microRNA replacement therapy: a literature review. *J. Cell. Physiol.* 233, 5574–5588.
51. Jansson, M.D., and Lund, A.H. (2012). MicroRNA and cancer. *Mol. Oncol.* 6, 590–610.
52. Bail, S., Swerdel, M., Liu, H., Jiao, X., Goff, L.A., Hart, R.P., and Kiledjian, M. (2010). Differential regulation of microRNA stability. *RNA* 16, 1032–1039.
53. Glinge, C., Clauss, S., Boddum, K., Jabbari, R., Jabbari, J., Risgaard, B., Tomsits, P., Hildebrand, B., Kääh, S., Wakili, R., et al. (2017). Stability of circulating blood-based microRNAs—pre-analytic methodological considerations. *PLoS ONE* 12, e0167969.
54. Chen, Y., Gao, D.-Y., and Huang, L. (2015). In vivo delivery of miRNAs for cancer therapy: challenges and strategies. *Adv. Drug Deliv. Rev.* 81, 128–141.
55. Selvam, C., Mutisya, D., Prakash, S., Ranganna, K., and Thilagavathi, R. (2017). Therapeutic potential of chemically modified siRNA: Recent trends. *Chem. Biol. Drug Des.* 90, 665–678.
56. Biscans, A., Coles, A., Haraszti, R., Echeverria, D., Hassler, M., Osborn, M., and Khvorova, A. (2018). Diverse lipid conjugates for functional extra-hepatic siRNA delivery in vivo. *bioRxiv*. <https://doi.org/10.1101/289439>.
57. Osborn, M.F., Coles, A.H., Biscans, A., Haraszti, R.A., Roux, L., Davis, S., Ly, S., Echeverria, D., Hassler, M.R., Godinho, B.M.D.C., et al. (2019). Hydrophobicity drives the systemic distribution of lipid-conjugated siRNAs via lipid transport pathways. *Nucleic Acids Res.* 47, 1070–1081.
58. Gao, X., Dai, M., Li, Q., Wang, Z., Lu, Y., and Song, Z. (2017). HMGA2 regulates lung cancer proliferation and metastasis. *Thorac. Cancer* 8, 501–510.
59. MadhuKumar, S., Elena Armenteros-Monterroso, East, P., Probir Chakravorty, Nik Matthews, and MonteWinslow, M. (2014). HMGA2 acts as a ceRNA to stimulate lung cancer metastasis. *Cancer Discov.* 4, 141.
60. Johnson, C.D., Esquela-Kerscher, A., Stefani, G., Byrom, M., Kelnar, K., Ovcharenko, D., Wilson, M., Wang, X., Shelton, J., Shingara, J., et al. (2007). The *let-7* microRNA represses cell proliferation pathways in human cells. *Cancer Res.* 67, 7713–7722.
61. Janas, M.M., Schlegel, M.K., Harbison, C.E., Yilmaz, V.O., Jiang, Y., Parmar, R., Zlatev, I., Castoreno, A., Xu, H., Shulga-Morskaya, S., et al. (2018). Selection of GalNAc-conjugated siRNAs with limited off-target-driven rat hepatotoxicity. *Nat. Commun.* 9, 723.
62. Maier, M.A., Jayaraman, M., Matsuda, S., Liu, J., Barros, S., Querbes, W., Tam, Y.K., Ansell, S.M., Kumar, V., Qin, J., et al. (2013). Biodegradable lipids enabling rapidly eliminated lipid nanoparticles for systemic delivery of RNAi therapeutics. *Mol. Ther.* 21, 1570–1578.
63. Haraszti, R.A., Roux, L., Coles, A.H., Turanov, A.A., Alterman, J.F., Echeverria, D., Godinho, B.M.D.C., Aronin, N., and Khvorova, A. (2017). 5'-Vinylphosphonate improves tissue accumulation and efficacy of conjugated siRNAs in vivo. *Nucleic Acids Res.* 45, 7581–7592.

OMTN, Volume 19

## Supplemental Information

**Hydrophobically Modified *let-7b* miRNA**

**Enhances Biodistribution to NSCLC**

**and Downregulates HMGA2 *In Vivo***

**Meirav Segal, Annabelle Biscans, Maud-Emmanuelle Gilles, Eleni Anastasiadou, Roberto De Luca, Jihoon Lim, Anastasia Khvorova, and Frank J. Slack**

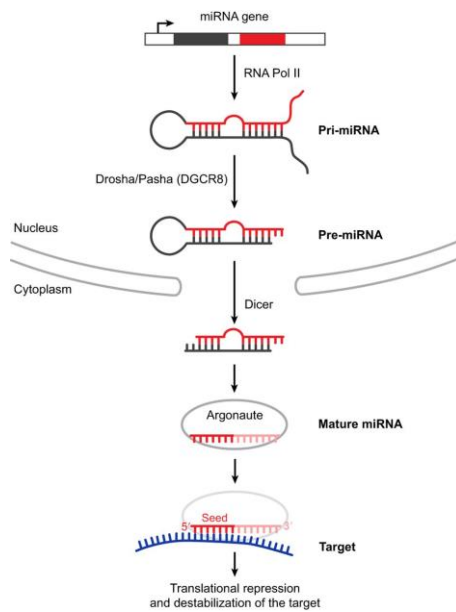

Suppl. Fig 1. MicroRNA biogenesis and mechanism of action. Canonical miRNA biogenesis begins with the generation of the pri-miRNA transcript. The complexes, Drosha and DiGeorge Syndrome Critical Region 8 (DGCR8), cleaves the pri-miRNA to produce the precursor-miRNA (pre-miRNA). The pre-miRNA is exported to the cytoplasm and processed to produce the mature miRNA duplex. Finally, either the 5p or 3p strands of the mature miRNA duplex is loaded into the Argonaute (AGO) proteins to induced gene silencing.

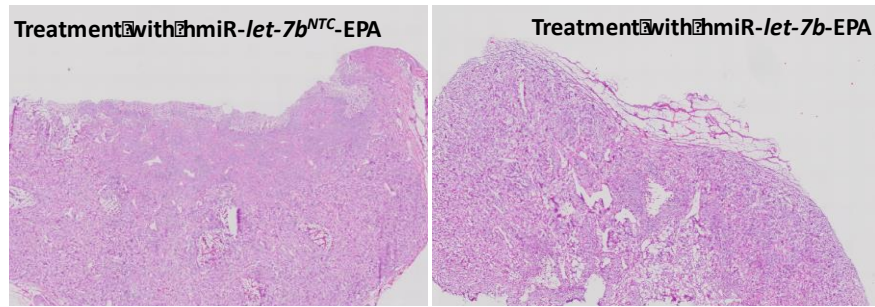

Suppl. Fig 2. A representative image of H&E staining from sections of the treated tumors with EPA-hmiR-*let-7b* and NTC
